# Supplementary material
Source: ML conference proceedings conference paper supplement (https://proceedings.neurips.cc/paper_files/paper/2019/hash/165a59f7cf3b5c4396ba65953d679f17-Abstract.html)
Supplement: Supplementary file [file 165a59f7cf3b5c4396ba65953d679f17-Supplemental.zip]

---

# Convergence Guarantees for Adaptive Bayesian Quadrature Methods

---

Motonobu Kanagawa<sup>†,\*</sup> and Philipp Hennig<sup>#</sup>

<sup>†</sup>EURECOM, Sophia Antipolis, France

<sup>#</sup>University of Tübingen and Max Planck Institute for Intelligent Systems, Tübingen, Germany  
motonobu.kanagawa@eurecom.fr & philipp.hennig@uni-tuebingen.de

## Abstract

Adaptive Bayesian quadrature (ABQ) is a powerful approach to numerical integration that empirically compares favorably with Monte Carlo integration on problems of medium dimensionality (where non-adaptive quadrature is not competitive). Its key ingredient is an acquisition function that changes as a function of previously collected values of the integrand. While this adaptivity appears to be empirically powerful, it complicates analysis. Consequently, there are no theoretical guarantees so far for this class of methods. In this work, for a broad class of adaptive Bayesian quadrature methods, we prove consistency, deriving non-tight but informative convergence rates. To do so we introduce a new concept we call *weak adaptivity*. Our results identify a large and flexible class of adaptive Bayesian quadrature rules as consistent, within which practitioners can develop empirically efficient methods.

## 1 Introduction

Numerical integration, or quadrature/cubature, is a fundamental task in many areas of science and engineering. This includes machine learning and statistics, where such problems arise when computing marginals and conditionals in probabilistic inference problems. In particular in hierarchical Bayesian inference, quadrature is generally required for the computation of the *marginal likelihood*, the key quantity for model selection, and for *prediction*, for which latent variables are to be marginalized out.

To describe the problem, let  $\Omega$  be a compact metric space,  $\mu$  be a finite positive Borel measure on  $\Omega$  (such as the Lebesgue measure on compact  $\Omega \subset \mathbb{R}^d$ ) that plays the role of reference measure,  $\pi : \Omega \rightarrow \mathbb{R}$  be a known density function, and  $f : \Omega \rightarrow \mathbb{R}$  be an *integrand*, a known function such that the function value  $f(x) \in \mathbb{R}$  can be obtained for any given query  $x \in \Omega$ . The task of quadrature is to numerically compute the integral (assumed to be intractable analytically)

$$\int f(x)\pi(x)d\mu(x).$$

This is done by evaluating the function values  $f(x_1), \dots, f(x_n)$  at design points  $x_1, \dots, x_n \in \Omega$  and using them to approximate  $f$  and the integral. The points  $x_1, \dots, x_n$  should be “good” in the sense that  $f(x_1), \dots, f(x_n)$  provide useful information for computing the the integral.

Monte Carlo methods are the classic alternative, where  $x_1, \dots, x_n$  are randomly generated from a proposal distribution and the integral is approximated as  $\sum_{i=1}^n w_i f(x_i)$ , with  $w_1, \dots, w_n$  being importance weights. Such Monte Carlo estimators achieve the convergence rate of order  $n^{-1/2}$  for  $n$  the number of design points, under a mild condition that  $f$  is a bounded function. This dimension-independent rate, and the mild condition about  $f$ , would be one of the reasons for the wide popularity and successes of Monte Carlo methods. However, as has been empirically known for practitioners

---

\*Most of this work was done when MK was affiliated with University of Tübingen and MPI IS, Germany

and also theoretically investigated recently [3, 10], practical (i.e. Markov Chain) Monte Carlo can struggle in high dimensional integration, requiring a huge number of sample points to give a reliable estimate:<sup>2</sup> the curse of dimensionality appears in the constant term in front of the rate  $n^{-1/2}$  [22, Sec. 2.5] [10, Thm. 2.1 and Sec. 3.4]. Thus, there has been a number of attempts on developing methods that work better than Monte Carlo for high dimensional integration, such as Quasi Monte Carlo methods [14].

Adaptive Bayesian quadrature (ABQ) is a recent approach from machine learning that actively, sequentially and deterministically selects design points to adapt to the target integrand [29, 30, 16, 1, 9]. It is an extension of Bayesian quadrature (BQ) [28, 15, 8, 21], a probabilistic numerical method for quadrature that makes use of prior knowledge about the integrand, such as smoothness and structure, via a Gaussian process (GP) prior. Convergence rates of BQ methods take the form  $n^{-s/d}$  if the integrand  $f$  is  $s$ -times differentiable, or of the form  $\exp(-Cn^{1/d})$  for some constant  $C > 0$  if  $f$  is infinitely smooth [8, 20]. While the rates can be faster than Monte Carlo, the dimension  $d$  of the ambient space now appears in the rate, meaning that BQ also suffers from the curse of dimensionality.

ABQ has been developed to improve upon such vanilla BQ methods. One drawback of vanilla BQ is that the Gaussian process model prevents the use of certain kinds of relevant knowledge about the integrand, such as it being *positive* (or non-negative), because they cannot be encoded in a Gaussian distribution. Positive integrands are ubiquitous in machine learning and statistics, where integration tasks emerge in the marginalization and conditioning of probability density functions, which are positive by definition. In ABQ such prior knowledge is modelled by describing the integrand as given by a certain *transformation* (or warping) of a GP — for instance, an exponentiated GP [30, 29, 9] or a squared GP [16]. ABQ methods with such transformations have empirically been shown to improve upon both standard BQ and Monte Carlo, leading to state-of-the-art wall-clock time performance on problems of medium dimensionality.

If the transformation is nonlinear, as in the examples above, the transformed GP no longer allows an analytic expression for its posterior process, and thus approximations are used to obtain a tractable acquisition function. In contrast to the posterior covariance of GPs, these acquisition functions then become dependent on previous observations, making the algorithm adaptive. This twist seems to be critical for ABQ methods’ superior empirical performance, but it complicates analysis. Thus, there has been no theoretical guarantee for their convergence, rendering them heuristics in practice. This is problematic since integration is usually an intermediate computational step in a larger system, and thus must be reliable. This paper provides the first convergence analysis for ABQ methods.

In Sec. 2 we review ABQ methods, and formulate a generic class of acquisition functions that cover those of [16, 1, 2, 9]. Our convergence analysis is done for this class. We also derive an upper-bound on the quadrature error using a transformed integrand, which is applicable to any design points and given in terms of the GP posterior variance (Prop. 2.1). In Sec. 3, we establish a connection between ABQ and certain *weak greedy algorithms* (Thm. 3.3). This is based on a new result that the scaled GP posterior variance can be interpreted in terms of a certain projection in a Hilbert space (Lemma 3.1). Using this connection, we derive convergence rates of ABQ methods in Sec. 4. For ease of the reader, we present a high-level overview of the proof structure in Fig. 1.

The key to our analysis is a relatively general notion for active exploration that we term *weak adaptivity*. An ABQ method that satisfies weak adaptivity (and a few additional technical constraints) is consistent, and the conceptual space of weakly adaptive BQ methods is large and flexible. We hope that our results spark a practical interest in the design of empirically efficient acquisition functions, to extend the reach of quadrature to problems of higher and higher dimensionality.

**Related Work.** For standard BQ methods, and the corresponding *kernel quadrature* rules, convergence properties have been studied extensively [e.g. 7, 19, 4, 40, 21, 11, 8, 27, 20]. Some of these works theoretically analyze methods that deterministically generate design points [12, 5, 17, 7, 11]. These methods are, however, *not* adaptive, as design points are generated independently to the function values of the target integrand.

Our analysis is technically related to the work by Santin and Haasdonk [34], which analyzed the so-called *P-greedy algorithm*, an algorithm to sequentially obtain design points using the GP posterior

<sup>2</sup>For instance, Wenliang et al. [39, Fig. 3] used  $10^{10}$  Monte Carlo samples to estimate the the normalizing constant of their model, on problems with medium dimensionality (10 to 50 dims).



$g_i(x) := z_i \in \mathbb{R}$  such that  $T(z_i) = f(x_i)$  for  $i = 1, \dots, n$ . Treating  $g(x_1), \dots, g(x_n)$  as “observed data without noise,” the posterior distribution of  $g$  under the GP prior (1) is again given as a GP

$$g|(x_i, g(x_i))_{i=1}^n \sim \mathcal{GP}(m_{g, X_n}, k_{X_n}),$$

where  $m_{g, X_n} : \Omega \rightarrow \mathbb{R}$  is the posterior mean function and  $k_{X_n} : \Omega \times \Omega \rightarrow \mathbb{R}$  is the posterior covariance kernel given by (see e.g. [32])

$$m_{g, X_n}(x) := m(x) + \mathbf{k}_n(x)^\top K_n^{-1}(\mathbf{g}_n - \mathbf{m}_n), \quad (2)$$

$$k_{X_n}(x, x') := k(x, x') - \mathbf{k}_n(x)^\top K_n^{-1} \mathbf{k}_n(x'), \quad (3)$$

where  $\mathbf{k}_n(x) := (k(x, x_1), \dots, k(x, x_n))^\top \in \mathbb{R}^n$ ,  $\mathbf{g}_n := (g(x_1), \dots, g(x_n))^\top \in \mathbb{R}^n$  and  $\mathbf{m}_n = (m(x_1), \dots, m(x_n))^\top \in \mathbb{R}^n$ . Then a quadrature estimate<sup>3</sup> for the integral  $\int f(x)\pi(x)d\mu(x)$  is given as the integral  $\int T(m_{g, X_n}(x))\pi(x)d\mu(x)$  of the transformed posterior mean function  $T(m_{g, X_n})$ , or as the integral of the posterior expectation of the transformation  $\int \mathbb{E}_{\hat{g}} T(\hat{g}(x))\pi(x)d\mu(x)$ , where  $\hat{g} \sim \mathcal{GP}(m_{g, X_n}, k_{X_n})$  is the posterior GP. The posterior covariance for  $\int f(x)\pi(x)$  is given similarly; see [9, 16] for details.

## 2.2 A Generic Form of Acquisition Functions

The key remaining question is how to select good design points  $x_1, \dots, x_n \in \Omega$ . ABQ methods sequentially and deterministically generate  $x_1, \dots, x_n$  using an *acquisition function*. Many of the acquisition functions can be formulated in the following generic form:

$$x_{\ell+1} \in \arg \max_{x \in \Omega} a_\ell(x), \quad \text{where} \quad a_\ell(x) = F(q^2(x)k_{X_\ell}(x, x)) b_\ell(x), \quad (\ell = 0, 1, \dots, n-1) \quad (4)$$

where  $k_{X_0}(x, x) := k(x, x)$ ,  $F : [0, \infty) \rightarrow [0, \infty)$  is an increasing function such that  $F(0) = 0$ ,  $q : \Omega \rightarrow (0, \infty)$  and  $b_\ell : \Omega \rightarrow \mathbb{R}$  is a function that may change at each iteration  $\ell$ . e.g., it may depend on the function values  $f(x_1), \dots, f(x_\ell)$  of the target integrand  $f$ . Intuitively,  $b_\ell(x)$  is a data-dependent term that makes the point selection adaptive to the target integrand,  $q(x)$  may be seen as a proposal density in importance sampling, and  $F$  determines the balance between the uncertainty sampling part  $q^2(x)k_{X_\ell}(x, x)$  and the adaptation term  $b_\ell(x)$ . We analyse ABQ with this generic form (4), aiming for results with wide applicability. Here are some representative choices.

**Warped Sequential Active Bayesian Integration (WSABI) [16]:** Gunter et al. [16] employ the square transformation  $f(x) = T(g(x)) = \alpha + \frac{1}{2}g^2(x)$  with two acquisition functions: i) WSABI-L [16, Eq. 15], which is based on linearization of  $T$  and recovered with  $F(y) = y$ ,  $q(x) = \pi(x)$  and  $b_\ell(x) = m_{g, X_\ell}^2(x)$ ; and ii) WSABI-M [16, Eq. 14], the one based on moment matching given by  $F(y) = y$ ,  $q(x) = \pi(x)$  and  $b_\ell(x) = \frac{1}{2}k_{X_\ell}(x, x) + m_{g, X_\ell}^2(x)$ .

**Moment-Matched Log-Transformation (MMLT) [9]:** Chai and Garnett [9, 3rd row in Table 1] use the exponential transformation  $f(x) = T(g(x)) = \exp(g(x))$  with the acquisition function given by  $F(y) = \exp(y) - 1$ ,  $q(x) = 1$  and  $b_\ell(x) = \exp(k_{X_\ell}(x, x) + 2m_{g, X_\ell}(x))$ .

**Variational Bayesian Monte Carlo (VBMC) [1, 2]:** Acerbi [2, Eq. 2] uses the identity  $f(x) = T(g(x)) = g(x)$  with the acquisition function given by  $F(y) = y^{\delta_1}$ ,  $q(x) = 1$  and  $b_\ell(x) = \pi_\ell^{\delta_2}(x) \exp(\delta_3 m_{g, X_\ell}(x))$ , where  $\pi_\ell$  is the variational posterior at the  $\ell$ -th iteration and  $\delta_1, \delta_2, \delta_3 \geq 0$  are constants: setting  $\delta_1 = \delta_2 = \delta_3 = 1$  recovers the original acquisition function [1, Eq. 9]. Acerbi [1, Sec. 2.1] considers an integrand  $f$  that is defined as the logarithm of a joint density, while  $\pi$  is an intractable posterior that is gradually approximated by the variational posteriors  $\pi_\ell$ .

For the WSABI and MMLT, the acquisition function (4) is obtained by a certain approximation for the posterior variance of the integral  $\int f(x)\pi(x)d\mu(x) = \int T(g(x))\pi(x)d\mu(x)$ ; thus this is a form of *uncertainty sampling*. Such an approximation is needed because the posterior variance of the integral is not available in closed form, due to the nonlinear transformation  $T$ . The resulting acquisition function includes the data-dependent term  $b_\ell(x)$ , which encourages exploration in regions where the value of  $g(x)$  is expected to be large. This makes ABQ methods adaptive to the target integrand. Alas, it also complicates analysis. Thus there has been no convergence guarantee for these ABQ methods; which is what we aim to remedy in this paper.

<sup>3</sup>The point is that, in contrast to the integral over  $f$ , this estimate should be analytically tractable. This depends on the choices for  $T$ ,  $k$  and  $\pi$ . For instance, for  $T(y) = y$  or  $T(y) = \alpha + \frac{1}{2}y^2$  with  $k$  and  $\pi$  Gaussian, the estimate can be obtained analytically [16], while for  $T(y) = \exp(y)$  one needs approximations; [cf. 9].

### 2.3 Bounding the Quadrature Error with Transformation

Our first result, which may be of independent interest, is an upper-bound on the error for the quadrature estimate  $\int T(m_{g,X_n}(x))\pi(x)d\mu(x)$  based on a transformation described in Sec. 2.1. It is applicable to any point set  $X_n = \{x_1, \dots, x_n\}$ , and the bound is given in terms of the posterior variance  $k_{X_n}(x, x)$ . This gives us a motivation to study the behavior of this quantity for  $x_1, \dots, x_n$  generated by ABQ (4) in the later sections. Note that the essentially same bound holds for the other estimator  $\int \mathbb{E}_{\hat{g}} T(\hat{g}(x))\pi(x)d\mu(x)$  with  $\hat{g} \sim \mathcal{GP}(m_{g,X_n}, k_{X_n})$ , which we describe in Appendix A.2.

To state the result, we need to introduce the Reproducing Kernel Hilbert Space (RKHS) of the covariance kernel  $k$  of the GP prior. See e.g. [35, 36] for details of RKHS's, and [6, 18] for discussions of their close but subtle relation to the GP notion. Let  $\mathcal{H}_k$  be the RKHS associated with the covariance kernel  $k$  of the GP prior (1), with  $\langle \cdot, \cdot \rangle_{\mathcal{H}_k}$  and  $\| \cdot \|_{\mathcal{H}_k}$  being its inner-product and norm, respectively.  $\mathcal{H}_k$  is a Hilbert space consisting of functions on  $\Omega$ , such that i)  $k(\cdot, x) \in \mathcal{H}_k$  for all  $x \in \Omega$ , and ii)  $h(x) = \langle k(\cdot, x), h \rangle_{\mathcal{H}_k}$  for all  $h \in \mathcal{H}_k$  and  $x \in \Omega$  (the reproducing property), where  $k(\cdot, x)$  denotes the function of the first argument such that  $y \rightarrow k(y, x)$ , with  $x$  being fixed. As a set of functions,  $\mathcal{H}_k$  is given as the closure of the linear span of such functions  $k(\cdot, x)$ , i.e.,  $\mathcal{H}_k = \overline{\text{span}\{k(\cdot, x) \mid x \in \Omega\}}$ , meaning that any  $h \in \mathcal{H}_k$  can be written as  $h = \sum_{i=1}^{\infty} \alpha_i k(\cdot, y_i)$  for some  $(\alpha_i)_{i=1}^{\infty} \subset \mathbb{R}$  and  $(y_i)_{i=1}^{\infty} \subset \Omega$  such that  $\|h\|_{\mathcal{H}_k}^2 = \sum_{i,j=1}^{\infty} \alpha_i \alpha_j k(y_i, y_j) < \infty$ . We are now ready to state our assumption:

**Assumption 1.**  $T : \mathbb{R} \rightarrow \mathbb{R}$  is continuously differentiable. For  $f : \Omega \rightarrow \mathbb{R}$ , there exists  $g : \Omega \rightarrow \mathbb{R}$  such that  $f(x) = T(g(x))$ ,  $x \in \Omega$  and that  $\tilde{g} := g - m \in \mathcal{H}_k$ . It holds that  $\|k\|_{L_{\infty}(\Omega)} := \sup_{x \in \Omega} k(x, x) < \infty$  and  $\|m\|_{L_{\infty}(\Omega)} := \sup_{x \in \Omega} |m(x)| < \infty$ .

The assumption  $\tilde{g} := g - m \in \mathcal{H}_k$  is common in theoretical analysis of standard BQ methods, where  $T(y) = y$  and  $m = 0$  [see e.g. 7, 40, 8, and references therein]. This assumption may be weakened by using proof techniques developed for standard BQ in the misspecified setting [19, 20], but we leave it for a future work. The other conditions on  $T$ ,  $k$  and  $m$  are weak.

**Proposition 2.1. (proof in Appendix A.1)** Let  $\Omega$  be a compact metric space,  $X_n = \{x_1, \dots, x_n\} \subset \Omega$  be such that the kernel matrix  $K_n = (k(x_i, x_j))_{i,j=1}^n \in \mathbb{R}^{n \times n}$  is invertible, and  $\pi : \Omega \rightarrow [0, \infty)$  and  $q : \Omega \rightarrow [0, \infty)$  be continuous functions such that  $C_{\pi/q} := \int_{\Omega} \pi(x)/q(x)d\mu(x) < \infty$ . Suppose that Assumption 1 is satisfied. Then there exists a constant  $C_{\tilde{g},m,k,T}$  depending only on  $\tilde{g}$ ,  $m$ ,  $k$  and  $T$  such that

$$\left| \int f(x)\pi(x)d\mu(x) - \int T(m_{g,X_n}(x))\pi(x)d\mu(x) \right| \leq C_{\tilde{g},m,k,T} C_{\pi/q} \|\tilde{g}\|_{\mathcal{H}_k} \sup_{x \in \Omega} q(x) \sqrt{k_{X_n}(x, x)}.$$

Prop. 2.1 shows that to establish convergence guarantees for ABQ methods, it is sufficient to analyze the convergence behavior of the quantity  $\sup_{x \in \Omega} q(x) \sqrt{k_{X_n}(x, x)}$  for points  $X_n = \{x_1, \dots, x_n\}$  generated from (4). This is what we focus on in the remainder.

### 3 Connections to Weak Greedy Algorithms in Hilbert Spaces

To analyze the quantity  $\sup_{x \in \Omega} q(x) \sqrt{k_{X_n}(x, x)}$  for points  $X_n = \{x_1, \dots, x_n\}$  generated from ABQ (4), we show here that the ABQ can be interpreted as a certain *weak greedy algorithm* studied by DeVore et al. [13]. To describe this, let  $\mathcal{H}$  be a (generic) Hilbert space and  $\mathcal{C} \subset \mathcal{H}$  be a compact subset. To define some notation, let  $h_1, \dots, h_n \in \mathcal{C}$  be given. Denote by  $S_n := \text{span}(h_1, \dots, h_n) = \{\sum_{i=1}^n \alpha_i h_i \mid \alpha_1, \dots, \alpha_n \in \mathbb{R}\} \subset \mathcal{H}$  the linear subspace spanned by  $h_1, \dots, h_n$ . For a given  $h \in \mathcal{C}$ , let  $\text{dist}(h, S_n)$  be the distance between  $h$  and  $S_n$  defined by

$$\text{dist}(h, S_n) := \inf_{g \in S_n} \|h - g\|_{\mathcal{H}} = \inf_{\alpha_1, \dots, \alpha_n \in \mathbb{R}} \|h - \sum_{i=1}^n \alpha_i h_i\|_{\mathcal{H}},$$

where  $\| \cdot \|_{\mathcal{H}}$  denotes the norm of  $\mathcal{H}$ . Geometrically, this is the distance between  $h$  and its orthogonal projection onto the subspace  $S_n$ . The task considered in [13] is to select  $h_1, \dots, h_n \in \mathcal{C}$  such that the worst case error in  $\mathcal{C}$  defined by

$$e_n(\mathcal{C}) := \sup_{h \in \mathcal{C}} \text{dist}(h, S_n) \quad (5)$$

becomes as small as possible:  $h_1, \dots, h_n \in \mathcal{C}$  are to be chosen to approximate well the set  $\mathcal{C}$ .

The following weak greedy algorithm is considered in DeVore et al. [13]. Let  $\gamma$  be a constant such that  $0 < \gamma \leq 1$ , and let  $n \in \mathbb{N}$ . First select  $h_1 \in \mathcal{C}$  such that  $\|h_1\|_{\mathcal{H}} \geq \gamma \sup_{h \in \mathcal{C}} \|h\|_{\mathcal{H}}$ . For  $\ell = 1, \dots, n-1$ , suppose that  $h_1, \dots, h_\ell$  have already been generated, and let  $S_\ell = \text{span}(h_1, \dots, h_\ell)$ . Then select a next element  $h_{\ell+1} \in \mathcal{C}$  such that

$$\text{dist}(h_{\ell+1}, S_\ell) \geq \gamma \sup_{h \in \mathcal{C}} \text{dist}(h, S_\ell), \quad (\ell = 1, \dots, n-1). \quad (6)$$

In this paper we refer to such  $h_1, \dots, h_n$  as a  $\gamma$ -weak greedy approximation of  $\mathcal{C}$  in  $\mathcal{H}$  because,  $\gamma = 1$  recovers the standard greedy algorithm, while  $\gamma < 1$  weakens the “greediness” of this rule. DeVore et al. [13] derived convergence rates of the worst case error (5) as  $n \rightarrow \infty$  for  $h_1, \dots, h_n$  generated from this weak greedy algorithm.

**Weak Greedy Algorithms in the RKHS.** To establish a connection to ABQ, we formulate the weak greedy algorithm in an RKHS. Let  $\mathcal{H}_k$  be the RKHS of the covariance kernel  $k$  as in Sec. 2.3, and  $q(x)$  be the function in (4). We define a subset  $\mathcal{C}_{k,q} \subset \mathcal{H}_k$  by

$$\mathcal{C}_{k,q} := \{q(x)k(\cdot, x) \mid x \in \Omega\} \subset \mathcal{H}_k.$$

Note that  $\mathcal{C}_{k,q}$  is the image of the mapping  $x \rightarrow q(x)k(\cdot, x)$  with  $\Omega$  being the domain. Therefore  $\mathcal{C}_{k,q}$  is compact, if  $k$  and  $q$  are continuous and  $\Omega$  is compact; this is because in this case the mapping  $x \rightarrow q(x)k(\cdot, x)$  becomes continuous, and in general the image of a continuous mapping from a compact domain is compact. Thus, we make the following assumption:

**Assumption 2.**  $\Omega$  is a compact metric space,  $q : \Omega \rightarrow \mathbb{R}$  is continuous with  $q(x) > 0$  for all  $x \in \Omega$ , and  $k : \Omega \times \Omega \rightarrow \mathbb{R}$  is continuous.

The following simple lemma establishes a key connection between weak greedy algorithms and ABQ. (Note that the result for the case  $q(x) = 1$  is well known in the literature, and the novelty lies in that we allow for  $q(x)$  to be non-constant.) For a geometric interpretation of (7) in terms of projections, see Fig.2 in Appendix B.1.

**Lemma 3.1. (proof in Appendix B.1)** Let  $x_1, \dots, x_n \in \Omega$  be such that the kernel matrix  $K_n = (k(x_i, x_j))_{i,j=1}^n \in \mathbb{R}^{n \times n}$  is invertible. Define  $h_x := q(x)k(\cdot, x)$  for any  $x \in \Omega$ , and let  $S_n := \text{span}(h_{x_1}, \dots, h_{x_n}) \subset \mathcal{H}_k$ . Assume that  $q(x) > 0$  holds for all  $x \in \Omega$ . Then for all  $x \in \Omega$  we have

$$q^2(x)k_{X_n}(x, x) = \text{dist}^2(h_x, S_n), \quad (7)$$

where  $k_{X_n}(x, x)$  is the GP posterior variance function given by (3). Moreover, we have

$$e_n(\mathcal{C}_{k,q}) = \sup_{x \in \Omega} q(x) \sqrt{k_{X_n}(x, x)}, \quad (8)$$

where  $e_n(\mathcal{C}_{k,q})$  is the worst case error defined by (5) with  $\mathcal{C} := \mathcal{C}_{k,q}$  and  $S_n$  defined here.

Lemma 3.1 (8) suggests that we can analyze the convergence properties of  $\sup_{x \in \Omega} q(x) \sqrt{k_{X_n}(x, x)}$  for  $X_n = \{x_1, \dots, x_n\}$  generated from the ABQ rule (4) by analyzing those of the worst case error  $e_n(\mathcal{C}_{k,q})$  for the corresponding elements  $h_{x_1}, \dots, h_{x_n}$ , where  $h_{x_i} := q(x_i)k(\cdot, x_i)$ .

**Adaptive Bayesian Quadrature as a Weak Greedy Algorithm.** We now show that the ABQ (4) gives a weak greedy approximation of the compact set  $\mathcal{C}_{k,q}$  in the RKHS  $\mathcal{H}_k$  in the sense of (6). We summarize required conditions in Assumptions 3 and 4. As mentioned in Sec. 1, Assumption 3 is the crucial one: its implications for certain specific ABQ methods will be discussed in Sec. 4.2.

**Assumption 3 (Weak Adaptivity Condition).** There are constants  $C_L, C_U > 0$  such that  $C_L < b_\ell(x) < C_U$  holds for all  $x \in \Omega$  and for all  $\ell \in \mathbb{N} \cup \{0\}$ .

Intuitively, this condition enforces ABQ to not overly focus on a specific local region in  $\Omega$  and to explore the entire domain  $\Omega$ . For instance, consider the following two situations where Assumption 3 does not hold: (a)  $b_\ell(x) \rightarrow +0$  as  $\ell \rightarrow \infty$  for some local region  $x \in A \subset \Omega$ , while  $b_\ell(x)$  remains bounded from below for  $x \in \Omega \setminus A$ ; (b)  $b_\ell(x) \rightarrow +\infty$  as  $\ell \rightarrow \infty$  for some local region  $x \in B \subset \Omega$ , while  $b_\ell(x)$  remains bounded from above for  $x \in \Omega \setminus B$ . In case (a), ABQ will not allocate any points to this region  $A$  at all, after a finite number of iterations. Thus, the information about the integrand  $f$

on this region  $A$  will not be obtained after a finite number of evaluations, which makes it difficult to guarantee the consistency of quadrature, unless  $f$  has a finite degree of freedom on  $A$ . Similarly, in case (b), ABQ will generate points only in the region  $B$  and no point in the rest of the region  $\Omega \setminus B$ , after a finite number of iterations. Assumption 3 prevents such problematic situations to occur.

**Assumption 4.**  $F : [0, \infty) \rightarrow [0, \infty)$  is increasing and continuous, and  $F(0) = 0$ . For any  $0 < c \leq 1$ , there is a constant  $0 < \psi(c) \leq 1$  such that  $F^{-1}(cy) \geq \psi(c)F^{-1}(y)$  holds for all  $y \geq 0$ .

For instance, if  $F(y) = y^\delta$  for  $\delta > 0$  then  $F^{-1}(y) = y^{1/\delta}$  and thus we have  $\psi(c) = c^{1/\delta}$  for  $0 < c \leq 1$ ;  $\delta = 1$  is the case for the WSABI [16], and  $\delta > 0$  for the VBMCI [1, 2]. If  $F(y) = \exp(y) - 1$  as in the MMLT [9], we have  $F^{-1}(y) = \log(y + 1)$  and it can be shown that  $\psi(c) = c$  for  $0 < c \leq 1$ ; see Appendix B.2. Note that in Assumption 4, the inverse  $F^{-1}$  is well-defined since  $F$  is increasing and continuous.

In our analysis, we allow for the point selection procedure of ABQ itself “weak,” in the sense that the optimization problem in (4) may be solved approximately.<sup>4</sup> That is, for a constant  $0 < \tilde{\gamma} \leq 1$  we assume that the points  $x_1, \dots, x_n$  satisfy

$$a_\ell(x_{\ell+1}) \geq \tilde{\gamma} \max_{x \in \Omega} a_\ell(x), \quad (\ell = 0, 1, \dots, n-1), \quad (9)$$

The case  $\tilde{\gamma} = 1$  amounts to exactly solving the global optimization problem of ABQ (4).

The following lemma guarantees we can assume without loss of generality that the kernel matrix  $K_n$  for the points  $x_1, \dots, x_n$  generated from the ABQ (4) is invertible under the assumptions above, since otherwise  $\sup_{x \in \Omega} k_{X_\ell}(x, x) = 0$  holds, implying that the quadrature error is 0 from Prop. 2.1. This guarantees the applicability of Lemma 3.1 for points generated from the ABQ (4).

**Lemma 3.2. (proof in Appendix B.3)** Suppose that Assumptions 2, 3 and 4 are satisfied. For a constant  $0 < \tilde{\gamma} \leq 1$ , assume that  $x_1, \dots, x_n$  are generated by a  $\tilde{\gamma}$ -weak version of ABQ (4), i.e., (9) is satisfied. Then either one of the following holds: i) the kernel matrix  $K_\ell = (k(x_i, x_j))_{i,j=1}^\ell \in \mathbb{R}^{\ell \times \ell}$  is invertible for all  $\ell = 1, \dots, n$ ; or ii) there exists some  $\ell = 1, \dots, n$  such that  $\sup_{x \in \Omega} k_{X_\ell}(x, x) = 0$ .

Lemma 3.1 leads to the following theorem, which establishes a connection between ABQ and weak greedy algorithms.

**Theorem 3.3. (proof in Appendix B.4)** Suppose that Assumptions 2, 3 and 4 are satisfied. For a constant  $0 < \tilde{\gamma} \leq 1$ , assume that  $x_1, \dots, x_n$  are generated by a  $\tilde{\gamma}$ -weak version of ABQ (4), i.e., (9) is satisfied. Let  $h_{x_i} = q(x_i)k(\cdot, x_i)$  for  $i = 1, \dots, n$ . Then  $h_{x_1}, \dots, h_{x_n}$  are a  $\gamma$ -weak greedy approximation of  $\mathcal{C}_{k,q}$  in  $\mathcal{H}_k$  with  $\gamma = \sqrt{\psi(\tilde{\gamma}C_L/C_U)}$ .

## 4 Convergence Rates of Adaptive Bayesian Quadrature

We use the connection established in the previous section to derive convergence rates of ABQ. To this end we introduce a quantity called *Kolmogorov  $n$ -width*, which is defined (for a Hilbert space  $\mathcal{H}$  and a compact subset  $\mathcal{C} \subset \mathcal{H}$ ) by

$$d_n(\mathcal{C}) := \inf_{U_n} \sup_{h \in \mathcal{C}} \text{dist}(h, U_n),$$

where the infimum is taken over all  $n$ -dimensional subspaces  $U_n$  of  $\mathcal{H}$ . This is the worst case error for the best possible solution using  $n$  elements in  $\mathcal{H}$ ; thus  $d_n(\mathcal{C}) \leq e_n(\mathcal{C})$  holds for any choice of  $S_n$  that defines the worst case error  $e_n(\mathcal{C})$  in (5). The following result by DeVore et al. [13, Corollary 3.3] relates the Kolmogorov  $n$ -width with the worst case error  $e_n(\mathcal{C})$  of a weak greedy algorithm.

**Lemma 4.1.** Let  $\mathcal{H}$  be a Hilbert space and  $\mathcal{C} \subset \mathcal{H}$  be a compact subset. For  $0 < \gamma \leq 1$ , let  $h_1, \dots, h_n \in \mathcal{C}$  be a  $\gamma$ -weak greedy approximation of  $\mathcal{C}$  in  $\mathcal{H}$  for  $n \in \mathbb{N}$ , and let  $e_n(\mathcal{C})$  be the worst case error (5) for the subspace  $S_n := \text{span}(h_1, \dots, h_n)$ . Then we have:

– **Exponential decay:** Assume that there exist constants  $\alpha > 0$ ,  $C_0 > 0$  and  $D_0 > 0$  such that  $d_n(\mathcal{C}) \leq C_0 \exp(-D_0 n^\alpha)$  holds for all  $n \in \mathbb{N}$ . Then  $e_n(\mathcal{C}) \leq \sqrt{2C_0} \gamma^{-1} \exp(-D_1 n^\alpha)$  holds for all  $n \in \mathbb{N}$  with  $D_1 := 2^{-1-2\alpha} D_0$ .

<sup>4</sup>We thank George Wynne for pointing out that our analysis can be extended to this weak version of ABQ.

– **Polynomial decay:** Assume that there exist constants  $\alpha > 0$  and  $C_0 > 0$  such that  $d_n(\mathcal{C}) \leq C_0 n^{-\alpha}$  holds for all  $n \in \mathbb{N}$ . Then  $e_n(\mathcal{C}) \leq C_1 n^{-\alpha}$  holds for all  $n \in \mathbb{N}$  with  $C_1 := 2^{5\alpha+1} \gamma^{-2} C_0$ .

– **Generic case:** We have  $e_n(\mathcal{C}) \leq \sqrt{2} \gamma^{-1} \min_{1 \leq \ell \leq n} (d_\ell(\mathcal{C}))^{n-\ell}$  for all  $n \in \mathbb{N}$ . In particular,  $e_{2n}(\mathcal{C}) \leq \sqrt{2} \gamma^{-1} \sqrt{d_n(\mathcal{C})}$  holds for all  $n \in \mathbb{N}$ .

Thus, the key is how to upper-bound the Kolmogorov  $n$ -width  $d_n(\mathcal{C}_{k,q})$  for the RKHS  $\mathcal{H}_k$  associated with the covariance kernel  $k$ . Given such an upper bound, one can then derive convergence rates for ABQ using Thm. 3.3.

Below we demonstrate such results in the setting where  $\Omega \subset \mathbb{R}^d$  is compact and  $\mu$  is the Lebesgue measure, focusing on kernels with infinite smoothness such as Gaussian and (inverse) multiquadric kernels, using Lemma 4.1 for the case of exponential decay. In a similar way (using Lemma 4.1 for the polynomial decay case) one can also derive rates for kernels with finite smoothness, such as Matérn and Wendland kernels. These additional results are presented in Appendix C.4. We emphasize that one can also analyze other cases (e.g. kernels on a sphere) by deriving upper-bounds on the Kolmogorov  $n$ -width and using Thm. 3.3.

#### 4.1 Convergence Rates for Kernels with Infinite Smoothness

We consider kernels with infinite smoothness, such as square-exponential kernels  $k(x, x') = \exp(-\|x - x'\|^2 / \gamma^2)$  with  $\gamma > 0$ , multiquadric kernels  $k(x, x') = (-1)^{\lceil \beta \rceil} (c^2 + \|x - x'\|^2)^\beta$  with  $\beta, c > 0$  such that  $\beta \notin \mathbb{N}$ , where  $\lceil \beta \rceil$  denotes the smallest integer greater than  $\beta$ , and inverse multiquadric kernels  $k(x, x') = (c^2 + \|x - x'\|^2)^{-\beta}$  with  $\beta > 0$ . We have the following bound on the Kolmogorov  $n$ -width of the  $\mathcal{C}_{k,q}$  for these kernels; the proof is in Appendix C.2.

**Proposition 4.2.** *Let  $\Omega \subset \mathbb{R}^d$  be a cube, and suppose that Assumption 2 is satisfied. Let  $k$  be a square-exponential kernel or an (inverse) multiquadric kernel. Then there exist constants  $C_0, D_0 > 0$  such that  $d_n(\mathcal{C}_{k,q}) \leq C_0 \exp(-D_0 n^{1/d})$  holds for all  $n \in \mathbb{N}$ .*

The requirement for  $\Omega$  to be a cube stems from the use of Wendland [38, Thm. 11.22] in our proof, which requires this condition. In fact, this can be weakened to  $\Omega$  being a compact set satisfying an interior cone condition, but the resulting rate weakens to  $O(\exp(-D_1 n^{-1/2d}))$  (note that this is still exponential); see [38, Sec. 11.4]. This also applies to the following results. Combining Prop. 4.2 with Lemma 3.1, Thm. 3.3 and Lemma 4.1, we now obtain a bound on  $\sup_{x \in \Omega} q(x) \sqrt{k_{X_n}(x, x)}$ .

**Theorem 4.3. (proof in Appendix C.3)** *Suppose that Assumptions 2, 3 and 4 are satisfied. Let  $\Omega \subset \mathbb{R}^d$  be a cube, and  $k$  be a square-exponential kernel or an (inverse) multiquadric kernel. For a constant  $0 < \tilde{\gamma} \leq 1$ , assume that  $X_n = \{x_1, \dots, x_n\} \subset \Omega$  are generated by a  $\tilde{\gamma}$ -weak version of ABQ (4), i.e., (9) is satisfied. Then there exist constants  $C_1, D_1 > 0$  such that*

$$\sup_{x \in \Omega} q(x) \sqrt{k_{X_n}(x, x)} \leq C_1 \psi(\tilde{\gamma} C_L / C_U)^{-1/2} \exp(-D_1 n^{1/d}) \quad (n \in \mathbb{N}).$$

As a directly corollary of Prop. 2.1 and Thm. 4.3, we finally obtain a convergence rate of the ABQ with an infinitely smooth kernel, which is exponentially fast.

**Corollary 4.4.** *Suppose that Assumptions 1, 2, 3 and 4 are satisfied, and that  $C_{\pi/q} := \int_{\Omega} \pi(x)/q(x) d\mu(x) < \infty$ . Let  $\Omega \subset \mathbb{R}^d$  be a cube, and  $k$  be a square-exponential kernel or a (inverse) multiquadric kernel. For a constant  $0 < \tilde{\gamma} \leq 1$ , assume that  $X_n = \{x_1, \dots, x_n\} \subset \Omega$  are generated by a  $\tilde{\gamma}$ -weak version of ABQ (4), i.e., (9) is satisfied. Then there exists a constant  $D_1 > 0$  independent of  $n \in \mathbb{N}$  such that*

$$\left| \int f(x) \pi(x) d\mu(x) - \int T(m_{g, X_n}(x)) \pi(x) d\mu(x) \right| = O(\exp(-D_1 n^{1/d})) \quad (n \rightarrow \infty).$$

#### 4.2 Discussions of the Weak Adaptivity Condition (Assumption 3)

We discuss consequences of our results to individual ABQ methods reviewed in Sec. 2.2. We do this in particular by discussing the weak adaptivity condition (Assumption 3), which requires that the data-dependent term  $b_n(x)$  in (4) is uniformly bounded away from zero and infinity. (A discussion



for VBMCMC by Acerbi [1, 2] is given in Appendix C.8. To summarize, Assumption 3 holds if the densities of the variational distributions are bounded away uniformly from zero and infinity.)

We first consider the WSABI-L approach by Gunter et al. [16], for which  $b_n(x) = (m_{g,X_n}(x))^2$ ; a similar result is presented for the WSABI-M in Appendix C.7. The following bounds for  $b_n(x)$  follow from Lemma C.5 in Appendix C.5.

**Lemma 4.5.** *Let  $b_n(x) := (m_{g,X_n}(x))^2$ . Suppose that Assumption 1 is satisfied, and that  $\inf_{x \in \Omega} |m(x)| > 2\|\tilde{g}\|_{\mathcal{H}_k} \|k\|_{L_\infty(\Omega)}^{1/2}$ . Then Assumption 3 holds for  $C_L := \left(\inf_{x \in \Omega} |m(x)| - 2\|\tilde{g}\|_{\mathcal{H}_k} \|k\|_{L_\infty(\Omega)}^{1/2}\right)^2 > 0$  and  $C_U := \left(\|m\|_{L_\infty(\Omega)} + 2\|\tilde{g}\|_{\mathcal{H}_k} \|k\|_{L_\infty(\Omega)}^{1/2}\right)^2 < \infty$ .*

Lemma 4.5 implies that WSABI-L may *not* be consistent when, e.g., one uses the zero prior mean function  $m(x) = 0$ , since in this case the condition  $\inf_{x \in \Omega} |m(x)| > 2\|\tilde{g}\|_{\mathcal{H}_k} \|k\|_{L_\infty(\Omega)}^{1/2}$  is not satisfied. Intuitively, the inconsistency may happen because the posterior mean  $m_{g,X_n}(x)$  for inputs  $x$  in regions distant from the current design points  $x_1, \dots, x_n$  would become close to 0, since the prior mean function is 0; and such regions will never be explored in the subsequent iterations, because of the form  $b_n(x) = (m_{g,X_n}(x))^2$ . One simple way to guarantee the consistency is to make a modification like  $b_n(x) := \frac{1}{2}(m_{g,X_n}(x))^2 + \alpha = T(m_{g,X_n}(x))$ ; then we can guarantee that  $C_L \geq \alpha > 0$ , encouraging exploration in the whole region  $\Omega$ . This then makes the algorithm consistent.

We next consider the MMLT method by Chai and Garnett [9], for which  $b_n(x) = \exp(k_{X_n}(x, x) + 2m_{g,X_n}(x))$ . Lemma 4.6 below shows that the weak adaptivity condition holds for the MMLT as long as Assumption 1 is satisfied. Therefore different from the WSABI, the MMLT is consistent without requiring a further assumption.

**Lemma 4.6. (proof in Appendix C.6)** *Let  $b_n(x) := \exp(k_{X_n}(x, x) + 2m_{g,X_n}(x))$ . Suppose that Assumption 1 is satisfied. Then Assumption 3 holds for  $C_L := \exp(-2\|m\|_{L_\infty(\Omega)} - 4\|\tilde{g}\|_{\mathcal{H}_k} \|k\|_{L_\infty(\Omega)}^{1/2}) > 0$  and  $C_U := \exp(\|k\|_{L_\infty(\Omega)} + 2\|m\|_{L_\infty(\Omega)} + 4\|\tilde{g}\|_{\mathcal{H}_k} \|k\|_{L_\infty(\Omega)}^{1/2}) < \infty$ .*

## 5 Conclusion and Outlook

Extending efficient numerical integration beyond the low-dimensional domain remains both a formidable challenge and a crucial desideratum for many areas. In machine learning, efficient numerical integration in the high-dimensional domain would be a game-changer for Bayesian learning. Developed by, and used in, the NeurIPS community, adaptive Bayesian quadrature is a promising new direction for progress in this fundamental problem class. So far, it has been hindered by the absence of theoretical guarantees.

In this work, we have provided the first known convergence guarantees for ABQ methods, by analyzing a generic form of their acquisition functions. Of central importance is the notion of weak adaptivity which, speaking vaguely, ensures that the algorithm asymptotically does not “overly focus” on some evaluations. It is conceptually related to ideas like detailed balance and ergodicity, which play a similar role for Markov Chain Monte Carlo methods (where, speaking equally vaguely, they guard against the same kind of locality) [cf. §6.5 & 6.6 in 33]. Like those of MCMC, our sufficient conditions for consistency span a flexible class of design options, and can thus act as a guideline for the design of novel acquisition functions for ABQ, guided by practical and intuitive considerations. Based on the results presented herein, novel ABQ methods may be proposed for novel domains other than only positive integrands, for example integrands with discontinuities [31] and those with spatially inhomogeneous smoothness.

An important theoretical question, however, remains to be addressed: While our results provide convergence guarantees for ABQ methods, they do not provide a theoretical explanation for why, how and when ABQ methods should be fundamentally *better* than non-adaptive methods. In fact, little is known about theoretical properties of adaptive quadrature methods in general. In applied mathematics, they remain an open problem [23, 24, 25, 26]. While we have to leave this question of ABQ’s potential advantages over standard BQ for future research, we consider this area to be highly promising on account of the fundamental role of high-dimensional integrals of structured functions in probabilistic machine learning.

## Acknowledgements

We would like to express our gratitude to the anonymous reviewers for their constructive feedback. We also thank Alexandra Gessner, Hans Kersting, Tim Sullivan and George Wynne for their comments and for fruitful discussions. The authors gratefully acknowledge financial supports by the European Research Council through ERC StG Action 757275 / PANAMA, by the DFG Cluster of Excellence “Machine Learning – New Perspectives for Science”, EXC 2064/1, project number 390727645, by the German Federal Ministry of Education and Research (BMBF) through the Tübingen AI Center (FKZ: 01IS18039A, 01IS18039B), and by the Ministry of Science, Research and Arts of the State of Baden-Württemberg.

## References

- [1] L. Acerbi. Variational Bayesian Monte Carlo. In S. Bengio, H. Wallach, H. Larochelle, K. Grauman, N. Cesa-Bianchi, and R. Garnett, editors, *Advances in Neural Information Processing Systems 31*, pages 8213–8223. Curran Associates, Inc., 2018.
- [2] L. Acerbi. An Exploration of Acquisition and Mean Functions in Variational Bayesian Monte Carlo. In Francisco Ruiz, Cheng Zhang, Dawen Liang, and Thang Bui, editors, *Proceedings of The 1st Symposium on Advances in Approximate Bayesian Inference*, volume 96 of *Proceedings of Machine Learning Research*, pages 1–10. PMLR, 02 Dec 2019.
- [3] S. Agapiou, O. Papaspiliopoulos, D. Sanz-Alonso, and A. M. Stuart. Importance Sampling: Intrinsic Dimension and Computational Cost. *Statistical Science*, 32(3):405–431, 2017.
- [4] F. Bach. On the equivalence between kernel quadrature rules and random feature expansions. *Journal of Machine Learning Research*, 18(19):1–38, 2017.
- [5] F. Bach, S. Lacoste-Julien, and G. Obozinski. On the equivalence between herding and conditional gradient algorithms. In *Proceedings of the 29th International Conference on Machine Learning (ICML2012)*, pages 1359–1366, 2012.
- [6] A. Berlinet and C. Thomas-Agnan. *Reproducing kernel Hilbert spaces in probability and statistics*. Kluwer Academic Publisher, 2004.
- [7] F-X. Briol, C. J. Oates, M. Girolami, and M. A. Osborne. Frank-Wolfe Bayesian quadrature: Probabilistic integration with theoretical guarantees. In *Advances in Neural Information Processing Systems 28*, pages 1162–1170, 2015.
- [8] F.-X. Briol, C.J. Oates, M. Girolami, M.A. Osborne, and D. Sejdinovic. Probabilistic Integration: A Role in Statistical Computation? (with Discussion and Rejoinder). *Statistical Science*, 34(1):1–22; rejoinder: 38–42, 2019.
- [9] H. R. Chai and R. Garnett. Improving quadrature for constrained integrands. In Kamalika Chaudhuri and Masashi Sugiyama, editors, *Proceedings of the 22nd International Conference on Artificial Intelligence and Statistics (AISTATS)*, volume 89 of *Proceedings of Machine Learning Research*, pages 2751–2759. PMLR, 16–18 Apr 2019.
- [10] S. Chatterjee and P. Diaconis. The sample size required in importance sampling. *Annals of Applied Probability*, 28(2):1099–1135, 2018.
- [11] W. Y. Chen, L. Mackey, J. Gorham, F. X. Briol, and C. Oates. Stein points. In J Dy and A. Krause, editors, *Proceedings of the 35th International Conference on Machine Learning*, volume 80 of *Proceedings of Machine Learning Research*, pages 844–853. PMLR, 2018.
- [12] Y. Chen, M. Welling, and A. Smola. Supersamples from kernel-herding. In *Proceedings of the 26th Conference on Uncertainty in Artificial Intelligence (UAI 2010)*, pages 109–116, 2010.
- [13] R. DeVore, G. Petrova, and P. Wojtaszczyk. Greedy algorithms for reduced bases in Banach spaces. *Constructive Approximation*, 37(3):455–466, 2013.
- [14] J. Dick, F. Y. Kuo, and I. H. Sloan. High dimensional numerical integration - the Quasi-Monte Carlo way. *Acta Numerica*, 22(133-288), 2013.

- [15] Z. Ghahramani and C. E. Rasmussen. Bayesian Monte Carlo. In S. Becker, S. Thrun, and K. Obermayer, editors, *Advances in Neural Information Processing Systems 15*, pages 505–512. MIT Press, 2003.
- [16] T. Gunter, M. A. Osborne, R. Garnett, P. Hennig, and S. J. Roberts. Sampling for Inference in Probabilistic Models with Fast Bayesian Quadrature. In Z. Ghahramani, M. Welling, C. Cortes, N. D. Lawrence, and K. Q. Weinberger, editors, *Advances in Neural Information Processing Systems 27*, pages 2789–2797. Curran Associates, Inc., 2014.
- [17] F. Huszár and D. Duvenaud. Optimally-weighted herding is Bayesian quadrature. In *Uncertainty in Artificial Intelligence*, pages 377–385, 2012.
- [18] M. Kanagawa, P. Hennig, D. Sejdinovic, and B. K. Sriperumbudur. Gaussian processes and kernel methods: A review on connections and equivalences. *ArXiv preprint*, 1807.02582v1, July 2018.
- [19] M. Kanagawa, B. K. Sriperumbudur, and K. Fukumizu. Convergence guarantees for kernel-based quadrature rules in misspecified settings. In D. D. Lee, M. Sugiyama, U. V. Luxburg, I. Guyon, and R. Garnett, editors, *Advances in Neural Information Processing Systems 29*, pages 3288–3296. Curran Associates, Inc., 2016.
- [20] M. Kanagawa, B. K. Sriperumbudur, and K. Fukumizu. Convergence analysis of deterministic kernel-based quadrature rules in misspecified settings. *Foundations of Computational Mathematics*, 2019.
- [21] T. Karvonen, C. J. Oates, and S. Sarkka. A Bayes-Sard cubature method. In S. Bengio, H. Wallach, H. Larochelle, K. Grauman, N. Cesa-Bianchi, and R. Garnett, editors, *Advances in Neural Information Processing Systems 31*, pages 5882–5893. Curran Associates, Inc., 2018.
- [22] J. S. Liu. *Monte Carlo Strategies in Scientific Computing*. Springer-Verlag, New York, 2001.
- [23] E. Novak. The adaption problem for nonsymmetric convex sets. *Journal of Approximation Theory*, 82:123–134, 1995.
- [24] E. Novak. Optimal recovery and n-widths for convex classes of functions. *Journal of Approximation Theory*, 80:390–408, 1995.
- [25] E. Novak. On the power of adaption. *Journal of Complexity*, 12:199–237, 1996.
- [26] E. Novak. Some results on the complexity of numerical integration. In R. Cools and D. Nuyens, editors, *Monte Carlo and Quasi-Monte Carlo Methods. Springer Proceedings in Mathematics & Statistics*, volume 163, pages 161–183. Springer, Cham, 2016.
- [27] C. J. Oates, J. Cockayne, F-X. Briol, and M. Girolami. Convergence rates for a class of estimators based on Stein’s method. *Bernoulli*, 25(2):1141–1159, 2019.
- [28] A. O’Hagan. Bayes–Hermite quadrature. *Journal of Statistical Planning and Inference*, 29:245–260, 1991.
- [29] M. A. Osborne, D. K. Duvenaud, R. Garnett, C. E. Rasmussen, S. J. Roberts, and Z. Ghahramani. Active learning of model evidence using Bayesian quadrature. In *Advances in Neural Information Processing Systems (NIPS)*, pages 46–54, 2012.
- [30] M. A. Osborne, R. Garnett, S. J. Roberts, C. Hart, S. Aigrain, and N. Gibson. Bayesian quadrature for ratios. In *International Conference on Artificial Intelligence and Statistics (AISTATS)*, pages 832–840, 2012.
- [31] L. Plaskota and G. W. Wasilkowski. The power of adaptive algorithms for functions with singularities. *Journal of Fixed Point Theory and Applications*, 6:227–248, 2009.
- [32] E. Rasmussen and C. K. I. Williams. *Gaussian Processes for Machine Learning*. MIT Press, 2006.
- [33] C. Robert and G. Casella. *Monte Carlo Statistical Methods*. Springer, 2004.

- [34] G. Santin and B. Haasdonk. Convergence rate of the data-independent P-greedy algorithm in kernel-based approximation. *Dolomites Research Notes on Approximation*, 10:68–78, 2017.
- [35] B. Schölkopf and A. J. Smola. *Learning with Kernels*. MIT Press, 2002.
- [36] I. Steinwart and A. Christmann. *Support Vector Machines*. Springer, 2008.
- [37] H. Wendland. Piecewise polynomial, positive definite and compactly supported radial functions of minimal degree. *Advances in Computational Mathematics*, 4(1):389–396, 1995.
- [38] H. Wendland. *Scattered Data Approximation*. Cambridge University Press, Cambridge, UK, 2005.
- [39] L. Wenliang, D. Sutherland, H. Strathmann, and A. Gretton. Learning deep kernels for exponential family densities. In Kamalika Chaudhuri and Ruslan Salakhutdinov, editors, *Proceedings of the 36th International Conference on Machine Learning*, volume 97 of *Proceedings of Machine Learning Research*, pages 6737–6746, Long Beach, California, USA, 09–15 Jun 2019. PMLR.
- [40] X. Xi, F. X. Briol, and M. Girolami. Bayesian quadrature for multiple related integrals. In J. Dy and A. Krause, editors, *Proceedings of the 35th International Conference on Machine Learning*, volume 80 of *Proceedings of Machine Learning Research*, pages 5373–5382. PMLR, 2018.

## A Appendices for Section 2

### A.1 Proof of Prop. 2.1

In the proof we use the following notation:  $\|\sqrt{k}\|_{L_\infty} := \sup_{x \in \Omega} \sqrt{k(x, x)}$  and  $\|\sqrt{k_{X_n}}\|_{L_\infty} := \sup_{x \in \Omega} \sqrt{k_{X_n}(x, x)}$ .

*Proof.* It is known that (see e.g. [18, Prop. 3.10]) the GP posterior standard deviation can be written as

$$\sqrt{k_{X_n}(x, x)} = \sup_{u \in \mathcal{H}_k: \|u\|_{\mathcal{H}_k} \leq 1} |u(x) - \mathbf{k}_n(x)^\top K_n^{-1} \mathbf{u}_n|, \quad x \in \Omega \quad (10)$$

where  $\mathbf{u} := (u(x_1), \dots, u(x_n))^\top \in \mathbb{R}^n$ . Note that for any  $x \in \Omega$ , we have  $m_{g, X_n}(x) = m(x) + \mathbf{k}_n^\top(x) K_n^{-1} \tilde{\mathbf{g}}_n$ , since  $\tilde{\mathbf{g}}_n = (\tilde{g}(x_i))_{i=1}^n = (m(x_i) - g(x_i))_{i=1}^n = \mathbf{m}_n - \mathbf{g}_n$ . Therefore by  $g(x) = m(x) + \tilde{g}(x)$ ,  $\tilde{g} \in \mathcal{H}_k$  and (10) we have

$$|g(x) - m_{g, X_n}(x)| = |\tilde{g}(x) - \mathbf{k}_n^\top(x) K_n^{-1} \tilde{\mathbf{g}}| \leq \|\tilde{g}\|_{\mathcal{H}_k} \sqrt{k_{X_n}(x, x)}. \quad (11)$$

On the other hand, by Taylor's theorem, there exists  $\alpha_{x, X_n} \in [0, 1]$  such that for  $y_{x, X_n} := g(x) + \alpha_{x, X_n}(m_{g, X_n}(x) - g(x)) \in \mathbb{R}$  we have

$$T(m_{g, X_n}(x)) = T(g(x)) + T'(y_{x, X_n})(m_{g, X_n}(x) - g(x)),$$

where  $T'(y)$  denotes the derivative of  $T$  at  $y \in \mathbb{R}$ . From this and (11) we have

$$|T(g(x)) - T(m_{g, X_n}(x))| \leq |T'(y_{x, X_n})| |m_{g, X_n}(x) - g(x)| \leq |T'(y_{x, X_n})| \|\tilde{g}\|_{\mathcal{H}_k} \sqrt{k_{X_n}(x, x)}$$

Note that  $|T'(y_{x, X_n})|$  is uniformly bounded over all  $x \in \Omega$  and  $n \in \mathbb{N}$ , since  $T'$  is continuous by assumption and  $|y_{x, X_n}|$  is bound uniformly over all  $x \in \Omega$  and  $n \in \mathbb{N}$ ; the latter can be shown as

$$\begin{aligned} |y_{x, X_n}| &\leq |g(x)| + |\alpha_{x, X_n}(m_{g, X_n}(x) - g(x))| \leq |m(x)| + |\tilde{g}(x)| + |m_{g, X_n}(x) - g(x)| \\ &\leq \|m\|_{L_\infty(\Omega)} + \|\tilde{g}\|_{\mathcal{H}_k} \sqrt{k(x, x)} + \|\tilde{g}\|_{\mathcal{H}_k} \sqrt{k_{X_n}(x, x)} \leq \|m\|_{L_\infty(\Omega)} + 2\|\tilde{g}\|_{\mathcal{H}_k} \|\sqrt{k}\|_{L_\infty}, \end{aligned}$$

where we used  $|\tilde{g}(x)| = |\langle \tilde{g}, k(\cdot, x) \rangle_{\mathcal{H}_k}| \leq \|\tilde{g}\|_{\mathcal{H}_k} \sqrt{k(x, x)}$  and  $k_{X_n}(x, x) \leq k(x, x)$ . This implies that

$$|T'(y_{x, X_n})| \leq \sup_{y \in \mathbb{R}: |y| \leq \|m\|_{L_\infty(\Omega)} + 2\|\tilde{g}\|_{\mathcal{H}_k} \|\sqrt{k}\|_{L_\infty}} |T'(y)| =: C_{\tilde{g}, m, k, T} < \infty.$$

Therefore,

$$|T(g(x)) - T(m_{g, X_n}(x))| \leq C_{\tilde{g}, m, k, T} \|\tilde{g}\|_{\mathcal{H}_k} \sqrt{k_{X_n}(x, x)},$$

which implies that

$$\begin{aligned} &\left| \int T(g(x)) \pi(x) d\mu(x) - \int T(m_{g, X_n}(x)) \pi(x) d\mu(x) \right| \\ &\leq \int |T(g(x)) - T(m_{g, X_n}(x))| \pi(x) d\mu(x) \\ &\leq C_{\tilde{g}, m, k, T} \|\tilde{g}\|_{\mathcal{H}_k} \int \sqrt{k_{X_n}(x, x)} \pi(x) d\mu(x) \\ &\leq C_{\tilde{g}, m, k, T} C_{\pi/q} \|\tilde{g}\|_{\mathcal{H}_k} \sup_{x \in \Omega} q(x) \sqrt{k_{X_n}(x, x)}, \end{aligned}$$

where the last inequality follows from Hölder's inequality.  $\square$

### A.2 Bound on Quadrature Error for an Alternative Estimator

We show here that for the quadrature estimator  $\int \mathbb{E}_{\tilde{g}} T(\tilde{g}(x)) \pi(x) d\mu(x)$ , where  $\tilde{g} \sim \mathcal{GP}(m_{g, X_n}, k_{X_n})$  is the posterior Gaussian process, the essentially same upper bound as Proposition 2.1 holds, under an additional condition that

$$\mathbb{E}_{\tilde{g}} [T'(|g(x)| + |\tilde{g}(x)|)^2] < C, \quad \forall x \in \Omega, \forall n \in \mathbb{N}, \quad (12)$$

holds for some  $C > 0$ , where  $T'$  is the derivative of  $T$ . This condition can be shown to be satisfied for transformations  $T$  considered in the paper.

**Proposition A.1.** Let  $\Omega$  be a compact metric space,  $X_n = \{x_1, \dots, x_n\} \subset \Omega$  be such that the kernel matrix  $K_n = (k(x_i, x_j))_{i,j=1}^n \in \mathbb{R}^{n \times n}$  is invertible, and  $\pi : \Omega \rightarrow [0, \infty)$  and  $q : \Omega \rightarrow [0, \infty)$  be continuous functions such that  $C_{\pi/q} := \int_{\Omega} \pi(x)/q(x) d\mu(x) < \infty$ . Suppose that Assumption 1 is satisfied. Let  $\dot{g} \sim \mathcal{GP}(m_{g,X_n}, k_{X_n})$  and assume (12) is satisfied for some  $C > 0$ . Then we have

$$\left| \int f(x) \pi(x) d\mu(x) - \int \mathbb{E}_{\dot{g}} T(\dot{g}(x)) \pi(x) d\mu(x) \right| \leq \sqrt{2C(1 + \|\tilde{g}\|_{\mathcal{H}_k}^2)} C_{\pi/q} \sup_{x \in \Omega} q(x) \sqrt{k_{X_n}(x, x)}.$$

*Proof.* First fix  $x \in \Omega$ . By Taylor's theorem, there exists  $\alpha_{x, X_n, \dot{g}} \in [0, 1]$  such that for  $y_{x, X_n, \dot{g}} := g(x) + \alpha_{x, X_n, \dot{g}}(\dot{g}(x) - g(x))$  we have

$$T(\dot{g}(x)) = T(g(x)) + T'(y_{x, X_n, \dot{g}})(\dot{g}(x) - g(x)).$$

Therefore,

$$\begin{aligned} (\mathbb{E}_{\dot{g}}[T(\dot{g}(x))] - T(g(x)))^2 &= (\mathbb{E}_{\dot{g}}[T'(y_{x, X_n, \dot{g}})(\dot{g}(x) - g(x))])^2 \\ &\leq \mathbb{E}_{\dot{g}}[(T'(y_{x, X_n, \dot{g}}))^2] \mathbb{E}_{\dot{g}}[(\dot{g}(x) - g(x))^2] \\ &\leq C \mathbb{E}_{\dot{g}}[(\dot{g}(x) - g(x))^2], \end{aligned}$$

where the last inequality follows from  $|y_{x, X_n, \dot{g}}| \leq |g(x)| + |\dot{g}(x)|$  and the assumption (12). Moreover,

$$\begin{aligned} \mathbb{E}_{\dot{g}}[(\dot{g}(x) - g(x))^2] &\leq 2\mathbb{E}_{\dot{g}}[(\dot{g}(x) - m_{g, X_n}(x))^2] + 2(m_{g, X_n}(x) - g(x))^2 \\ &\leq 2k_{X_n}(x, x) + 2\|\tilde{g}\|_{\mathcal{H}_k}^2 k_{X_n}(x, x), \end{aligned}$$

where the last inequality follows from (11). Thus,

$$|T(g(x)) - \mathbb{E}_{\dot{g}}[T(\dot{g}(x))]| \leq \sqrt{2C(1 + \|\tilde{g}\|_{\mathcal{H}_k}^2)} \sqrt{k_{X_n}(x, x)}$$

and it follows that

$$\begin{aligned} &\left| \int T(g(x)) \pi(x) d\mu(x) - \int \mathbb{E}_{\dot{g}}[T(\dot{g}(x))] \pi(x) d\mu(x) \right| \\ &\leq \int |T(g(x)) - \mathbb{E}_{\dot{g}}[T(\dot{g}(x))]| \pi(x) d\mu(x) \\ &\leq \sqrt{2C(1 + \|\tilde{g}\|_{\mathcal{H}_k}^2)} \int \sqrt{k_{X_n}(x, x)} \pi(x) d\mu(x) \\ &\leq \sqrt{2C(1 + \|\tilde{g}\|_{\mathcal{H}_k}^2)} C_{\pi/q} \sup_{x \in \Omega} q(x) \sqrt{k_{X_n}(x, x)}, \end{aligned}$$

where the last inequality follows from Hölder's inequality. □

## B Appendices for Section 3

### B.1 Proof of Lemma 3.1

*Proof.* It is easy to show by the reproducing property that the GP posterior variance  $k_{X_n}(x, x)$  in (3) can be written as the squared RKHS distance between  $k(\cdot, x)$  and its orthogonal projection onto  $\text{span}(k(\cdot, x_1), \dots, k(\cdot, x_n)) \subset \mathcal{H}_k$ , provided that the kernel matrix  $K_n = (k(x_i, x_j))_{i,j=1}^n \in \mathbb{R}^{n \times n}$  is invertible:

$$k_{X_n}(x, x) = \text{dist}^2(k(\cdot, x), \text{span}(k(\cdot, x_1), \dots, k(\cdot, x_n))) = \inf_{\alpha_1, \dots, \alpha_n \in \mathbb{R}} \|k(\cdot, x) - \sum_{i=1}^n \alpha_i k(\cdot, x_i)\|_{\mathcal{H}_k}^2.$$

Therefore,

$$\begin{aligned} q^2(x) k_{X_n}(x, x) &= \inf_{\alpha_1, \dots, \alpha_n \in \mathbb{R}} \|q(x) k(\cdot, x) - \sum_{i=1}^n \alpha_i q(x) k(\cdot, x_i)\|_{\mathcal{H}_k}^2 \\ &= \inf_{\beta_1, \dots, \beta_n \in \mathbb{R}} \|q(x) k(\cdot, x) - \sum_{i=1}^n \beta_i q(x_i) k(\cdot, x_i)\|_{\mathcal{H}_k}^2, \\ &= \inf_{g \in S_n} \|h_x - g\|_{\mathcal{H}_k}^2 = \text{dist}^2(h_x, S_n), \end{aligned}$$

where the second equality follows from  $q(x) > 0$  and  $q(x_i) > 0$  for all  $i = 1, \dots, n$ ; this proves (7). Using this, (5) and the definition of  $\mathcal{C}_{k,q}$ , the identity (8) can be shown as

$$e_n(\mathcal{C}_{k,q}) = \sup_{h \in \mathcal{C}_{k,q}} \text{dist}(h, S_n) = \sup_{x \in \Omega} \text{dist}(h_x, S_n) = \sup_{x \in \Omega} q(x) \sqrt{k_{X_n}(x, x)}.$$

□

Fig. 2 provides a geometric interpretation of (7) in Lemma 3.1 and its proof.

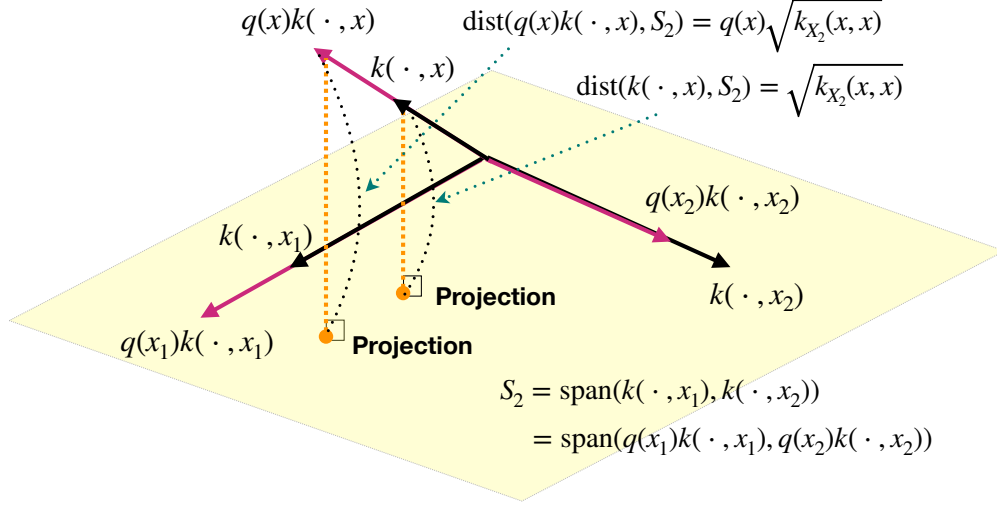

Figure 2: A geometric interpretation of (7) in Lemma 3.1, for a simple case where  $n = 2$ . The yellow plane represents the subspace  $S_2 := \text{span}(k(\cdot, x_1), k(\cdot, x_2)) = \text{span}(q(x_1)k(\cdot, x_1), q(x_2)k(\cdot, x_2))$ , where the identity follows from  $q(x_1), q(x_2) > 0$ .

## B.2 An Example for Assumption 4

The following lemma gives the constant  $\psi(c)$  in Assumption 4 for the case  $F(y) = \exp(y) - 1$ , and thus  $F^{-1}(y) = \log(1 + y)$ , of the MMLT [9]:  $\psi(c) = c$ . The proof is elementary, but we include it for completeness.

**Lemma B.1.** *For any  $0 < c \leq 1$ , we have  $\log(1 + cy) \geq c \log(1 + y)$  for all  $y \geq 0$ .*

*Proof.* The assertion is equivalent to that  $1 + cy \geq (1 + y)^c$  holds for all  $y \geq 0$ , which we show below. Let  $f(y) := 1 + cy$  and  $g(y) := (1 + y)^c$  for  $y \geq 0$ . Their derivatives are  $f'(y) = c$  and  $g'(y) = c(1 + y)^{c-1}$ , for which we have  $f'(y) \geq g'(y)$  for all  $y \geq 0$ , since  $c - 1 \leq 0$ . We also have  $f(0) = g(0) = 1$ . Therefore, by the fundamental theorem of calculus, we conclude that  $f(y) = f(0) + \int_0^y f'(\tilde{y})d\tilde{y} \geq g(0) + \int_0^y g'(\tilde{y})d\tilde{y} = g(y)$  for all  $y \geq 0$ . □

## B.3 Proof of Lemma 3.2

*Proof.* Let  $\ell = 1, \dots, n - 1$ , and assume that  $x_1, \dots, x_\ell \in \Omega$  are such that the kernel matrix  $K_\ell = (k(x_i, x_j))_{i,j=1}^\ell \in \mathbb{R}^{\ell \times \ell}$  is invertible; this is always true for  $\ell = 1$ . For  $x_{\ell+1} \in \Omega$  such that  $a_\ell(x_{\ell+1}) \geq \tilde{\gamma} \max_{x \in \Omega} a_\ell(x) = \tilde{\gamma} \max_{x \in \Omega} F(q^2(x)k_{X_\ell}(x, x))b_\ell(x)$  with  $0 < \tilde{\gamma} \leq 1$ , we show that either of the following holds: i)  $k(\cdot, x_{\ell+1})$  is linearly independent to  $k(\cdot, x_1), \dots, k(\cdot, x_\ell)$  and thus  $K_{\ell+1} = (k(x_i, x_j))_{i,j=1}^{\ell+1} \in \mathbb{R}^{(\ell+1) \times (\ell+1)}$  is invertible, or ii)  $\sup_{x \in \Omega} k_{X_\ell}(x, x) = 0$ .

Assume that ii) does not hold. Then there exists  $y \in \Omega$  such that  $k_{X_\ell}(y, y) > 0$ . For this  $y$  we have  $a_\ell(y) = F(q^2(y)k_{X_\ell}(y, y))b_\ell(y) > 0$ , since  $q(x), b_\ell(x) > 0$  for all  $x \in \Omega$ ,  $F(0) = 0$  and  $F$  is increasing. Therefore  $a_\ell(x_{\ell+1}) \geq \tilde{\gamma}a_\ell(y) > 0$ , and thus  $k_{X_\ell}(x_{\ell+1}, x_{\ell+1}) > 0$ . Note that since the

kernel matrix  $K_\ell$  is invertible, we have

$$k_{X_\ell}(x_{\ell+1}, x_{\ell+1}) = \inf_{\alpha_1, \dots, \alpha_n \in \mathbb{R}} \|k(\cdot, x_{\ell+1}) - \sum_{i=1}^{\ell} \alpha_i k(\cdot, x_i)\|_{\mathcal{H}_k}^2$$

This expression and  $k_{X_\ell}(x_{\ell+1}, x_{\ell+1}) > 0$  imply that  $k(\cdot, x_{\ell+1})$  is linearly independent to  $k(\cdot, x_1), \dots, k(\cdot, x_\ell)$ , since otherwise  $k(\cdot, x_{\ell+1})$  can be written as a linear combination of  $k(\cdot, x_1), \dots, k(\cdot, x_\ell)$ , and thus  $k_{X_\ell}(x_{\ell+1}, x_{\ell+1})$  becomes 0 from the above expression. Thus i) has been shown.  $\square$

#### B.4 Proof of Theorem 3.3

*Proof.* For  $\ell = 0, \dots, n-1$ , by  $a_\ell(x_{\ell+1}) \geq \tilde{\gamma} \sup_{x \in \Omega} a_\ell(x)$  and Assumption 3, we have

$$\begin{aligned} a_\ell(x_{\ell+1}) &\geq \tilde{\gamma} \sup_{x \in \Omega} F(q^2(x)k_{X_\ell}(x, x)) b_\ell(x) \\ &\geq \tilde{\gamma} C_L \sup_{x \in \Omega} F(q^2(x)k_{X_\ell}(x, x)) = \tilde{\gamma} C_L F\left(\sup_{x \in \Omega} q^2(x)k_{X_\ell}(x, x)\right), \end{aligned}$$

where the last equality follows from  $F$  being an increasing function. This implies by Assumption 3 that

$$F(q^2(x_{\ell+1})k_{X_\ell}(x_{\ell+1}, x_{\ell+1})) \geq (\tilde{\gamma} C_L / C_U) F\left(\sup_{x \in \Omega} q^2(x)k_{X_\ell}(x, x)\right)$$

and therefore, again by  $F$  being increasing and also by Assumption 4,

$$\begin{aligned} q^2(x_{\ell+1})k_{X_\ell}(x_{\ell+1}, x_{\ell+1}) &\geq F^{-1}\left((\tilde{\gamma} C_L / C_U) F\left(\sup_{x \in \Omega} q^2(x)k_{X_\ell}(x, x)\right)\right) \\ &\geq \psi(\tilde{\gamma} C_L / C_U) \sup_{x \in \Omega} q^2(x)k_{X_\ell}(x, x). \end{aligned}$$

Note that  $\|h_x\|_{\mathcal{H}_k}^2 = \|q(x)k(\cdot, x)\|_{\mathcal{H}_k}^2 = q^2(x)k(x, x)$  for all  $x \in \Omega$ . Therefore for  $\ell = 0$ , in which case  $k_{X_0}(x, x) = k(x, x)$ , we have  $\|h_{x_1}\|_{\mathcal{H}_k} \geq \sqrt{\psi(\tilde{\gamma} C_L / C_U) \sup_{x \in \Omega} \|h_x\|_{\mathcal{H}_k}} = \sqrt{\psi(\tilde{\gamma} C_L / C_U) \sup_{h \in \mathcal{C}_{k,q}} \|h\|_{\mathcal{H}_k}}$ . For  $\ell = 1, \dots, n-1$  we have by Lemma 3.1 (which is applicable from Assumption 2),

$$\begin{aligned} \text{dist}^2(h_{x_{\ell+1}}, S_\ell) &= q^2(x_{\ell+1})k_{X_\ell}(x_{\ell+1}, x_{\ell+1}) \\ &\geq \psi(\tilde{\gamma} C_L / C_U) \sup_{x \in \Omega} \text{dist}^2(h_x, S_\ell) = \psi(\tilde{\gamma} C_L / C_U) \sup_{h \in \mathcal{C}_{k,q}} \text{dist}^2(h, S_\ell). \end{aligned}$$

Thus (6) holds for  $\gamma = \sqrt{\psi(\tilde{\gamma} C_L / C_U)}$ , which completes the proof.  $\square$

## C Appendices for Section 4

### C.1 A Bound on the Kolmogorov n-width

**Lemma C.1.** *Let  $x_1, \dots, x_n \in \Omega$  be such that the kernel matrix  $K_n = (k(x_i, x_j))_{i,j=1}^n \in \mathbb{R}^{n \times n}$  is invertible. Assume that  $q(x) > 0$  for all  $x \in \Omega$ . Then we have  $d_n(\mathcal{C}_{k,q}) \leq \inf_{x_1, \dots, x_n \in \Omega} \sup_{x \in \Omega} q(x) \sqrt{k_{X_n}(x, x)}$ .*

*Proof.* Using Lemma 3.1, the Kolmogorov  $n$ -width can be upper-bounded as

$$\begin{aligned} d_n(\mathcal{C}_{k,q}) &= \inf_{U_n} \sup_{h \in \mathcal{C}_{k,q}} \text{dist}(h, U_n) = \inf_{U_n} \sup_{x \in \Omega} \text{dist}(h_x, U_n) \\ &\leq \inf_{x_1, \dots, x_n \in \Omega} \sup_{x \in \Omega} \text{dist}(h_x, S_n) = \inf_{x_1, \dots, x_n \in \Omega} \sup_{x \in \Omega} q(x) \sqrt{k_{X_n}(x, x)}, \end{aligned}$$

where the infimum in the first line is taken over all  $n$ -dimensional subspaces  $U_n$  of  $\mathcal{H}_k$ , and  $S_n = \text{span}(h_{x_1}, \dots, h_{x_n})$  with  $h_x = q(x)k(\cdot, x)$ .  $\square$



Lemma C.1 can be used for deriving upper-bounds on the Kolmogorov  $n$ -width  $d_n(\mathcal{C}_{k,q})$  for concrete examples of the kernel  $k$  on  $\Omega \subset \mathbb{R}^d$ . To this end, the key quantity is the *fill distance* defined by

$$h_{X_n, \Omega} := \sup_{x \in \Omega} \min_{i=1, \dots, n} \|x - x_i\|,$$

where  $X_n := \{x_1, \dots, x_n\} \subset \Omega$ . This measures how densely the points  $x_1, \dots, x_n$  fill the region  $\Omega$ .

## C.2 Proof of Prop. 4.2 (Kolmogorov $n$ -width for kernels with infinite smoothness)

*Proof.* By [38, Theorem 11.22], where  $k_{X_n}(x, x)$  is called the *power function*, there is a constant  $c > 0$  such that  $k_{X_n}(x, x) \leq \exp(-c_1/h_{X_n, \Omega})$  holds for any set of design points  $X_n = \{x_1, \dots, x_n\}$  with sufficiently small  $h_{X_n, \Omega}$ . If we define  $x_1, \dots, x_n$  as equally-spaced grid points in  $\Omega$ , then we have  $h_{X_n, \Omega} = c_2 n^{-1/d}$  for some  $c_2 > 0$  independent of  $n$ . Therefore for large enough  $n$ , we have  $k_{X_n}(x, x) \leq \exp(-c_1 c_2^{-1} n^{1/d})$ . In other words, there exists  $n_0 \in \mathbb{N}$  such that  $k_{X_n}(x, x) \leq \exp(-(c_1/c_2) n^{1/d})$  holds for all  $n \geq n_0$ . Note that there exists a constant  $c_3 > 0$  such that  $k_{X_n}(x, x') \leq c_3$  holds for all  $x \in \Omega$  and for all  $n$ , since  $\Omega$  is compact and  $k_{X_n}(x, x)$  is continuous w.r.t.  $x$  for any fixed  $n$  and non-increasing w.r.t.  $n$  for any fixed  $x \in \Omega$ .

Now, define  $c_4 > 0$  as a constant such that  $c_4 \exp(-(c_1/c_2) n_0^{1/d}) = c_3$ , and let  $c_5 := \max(c_4, 1)$ . Then, for  $n < n_0$  we have  $c_5 \exp(-(c_1/c_2) n^{1/d}) \geq c_4 \exp(-(c_1/c_2) n^{1/d}) \geq c_3 \geq k_{X_n}(x, x)$ . For  $n \geq n_0$ , we have  $c_5 \exp(-(c_1/c_2) n^{1/d}) \geq \exp(-(c_1/c_2) n^{1/d}) \geq k_{X_n}(x, x)$ . Therefore we conclude that  $k_{X_n}(x, x) \leq c_5 \exp(-(c_1/c_2) n^{1/d})$  holds for all  $n \in \mathbb{N}$  and  $x \in \Omega$ .

Note that  $\inf_{x_1, \dots, x_n \in \Omega} \sup_{x \in \Omega} q(x) \sqrt{k_{X_n}(x, x)} \leq \sup_{x \in \Omega} q(x) \sqrt{k_{X_n}(x, x)}$  holds for any fixed choice of  $x_1, \dots, x_n$  defining  $k_{X_n}(x, x)$  in the upper-bound. If we chose  $x_1, \dots, x_n$  as equally-spaced grid points in the upper-bound, we have that  $d_n(\mathcal{C}_{k,q}) \leq \inf_{x_1, \dots, x_n \in \Omega} \sup_{x \in \Omega} q(x) \sqrt{k_{X_n}(x, x)} \leq \sup_{x \in \Omega} q(x) \sqrt{c_5} \exp(-\frac{1}{2} c_1 c_2^{-1} n^{1/d})$  by Lemma C.1 and the above argument. Setting  $C_0 := \sup_{x \in \Omega} q(x) \sqrt{c_5}$  and  $D_0 := \frac{1}{2} c_1 c_2^{-1}$  concludes the proof.  $\square$

## C.3 Proof of Theorem 4.3

*Proof.* By Thm. 3.3,  $h_{x_1}, \dots, h_{x_n}$  are a  $\gamma$ -weak approximation of  $\mathcal{C}_{k,q}$  in  $\mathcal{H}_k$  with  $\gamma = \sqrt{\psi(\tilde{\gamma} C_L / C_U)}$ . From this, and by Lemma 4.1 (exponential) and Prop. 4.2, there exist  $C_0, D_0 > 0$  such that for  $C_1 := \sqrt{2} C_0$  and  $D_1 := 2^{-1-2/d} D_0$ , we have  $e_n(\mathcal{C}_{k,q}) \leq C_1 \psi(\tilde{\gamma} C_L / C_U)^{-1/2} \exp(-D_1 n^{-1/d})$  for all  $n \in \mathbb{N}$ . Combining this and (8) in Lemma 3.1 concludes the proof.  $\square$

## C.4 Convergence Rates for ABQ using Kernels with Finite Smoothness

We deal with here kernels with finite smoothness. In particular, we consider shift-invariant kernels of the form  $k(x, x') = \Phi(x - x')$  with  $\Phi \in L_1(\mathbb{R}^d)$  satisfying

$$c_1(1 + \|\omega\|^2)^{-r} \leq \hat{\Phi}(\omega) \leq c_2(1 + \|\omega\|^2)^{-r}, \quad \omega \in \mathbb{R}^d \quad (13)$$

for some  $c_1, c_2 > 0$  and  $r > d/2$ , where  $\hat{\Phi}$  denotes the Fourier transform of  $\Phi$ . The RKHS of such a kernel is norm-equivalent to a Sobolev space of order  $r$ , which consists of functions whose weak derivative up to order  $r$  exist and are square-integrable [38, Corollary 10.48]; thus  $r$  represents the smoothness of functions in the RKHS.

For instance, Matérn kernels [32, p. 84] of the form

$$k(x, x') = \frac{2^{1-\nu}}{\Gamma(\nu)} \left( \frac{\sqrt{2\nu} \|x - x'\|}{\ell} \right)^\nu K_\nu \left( \frac{\sqrt{2\nu} \|x - x'\|}{\ell} \right), \quad (\nu, \ell > 0)$$

where  $\Gamma$  is the Gamma function and  $K_\nu$  is the modified Bessel function of second kind, satisfy (13) with  $r = \nu + d/2$ . Another example is Wendland kernels [38, Theorem 10.35], which have compact supports and thus have computational advantages; see [37] and [38, Chapter 9] for details. In the following result, we use the notion of a Lipschitz boundary and an interior cone condition, the definitions of which can be found in, e.g., [20, Section 3] and references therein.

**Assumption 5.**  $\Omega \subset \mathbb{R}^n$  is a compact set having a Lipschitz boundary and satisfying an interior cone condition.

#### C.4.1 Kolmogorov n-width for kernels with finite smoothness

**Proposition C.2.** *Suppose that Assumptions 2 and 5 are satisfied. Let  $k(x, x') = \Phi(x - x')$  be a kernel satisfying (13) for  $r > d/2$ . Then there exists a constant  $C_0 > 0$  such that*

$$d_n(\mathcal{C}_{k,q}) \leq C_0 n^{-r/d+1/2}, \quad n \in \mathbb{N}.$$

*Proof.* By [38, Corollary 11.33] (where we set  $m = 0$  and  $q = \infty$ ), there exists a constant  $c_1 > 0$  such that for all  $g \in \mathcal{H}_k$  we have

$$\|g - m_{g,X_n}\|_{L_\infty(\Omega)} \leq c_1 h_{X_n,\Omega}^{r-d/2} \|g\|_{\mathcal{H}_k},$$

for  $X_n = \{x_1, \dots, x_n\} \subset \Omega$  with sufficiently small  $h_{X_n,\Omega}$ . By setting  $x_1, \dots, x_n$  as equally-spaced grid points in  $\Omega$ , there exists a constant  $c_2 > 0$  such that  $h_{X_n,\Omega} \leq c_2 n^{-1/d}$ . Therefore we have for some  $c_3 > 0$

$$\sup_{g \in \mathcal{H}_k: \|g\|_{\mathcal{H}_k} \leq 1} \|g - m_{g,X_n}\|_{L_\infty(\Omega)} \leq c_3 n^{-r/d+1/2}$$

for sufficiently large  $n$ . Note that the GP posterior variance can be written as (see e.g. [18, Prop. 3.10])

$$\sqrt{k_{X_n}(x, x)} = \sup_{g \in \mathcal{H}_k: \|g\|_{\mathcal{H}_k} \leq 1} |g(x) - m_{g,X_n}(x)|, \quad x \in \Omega.$$

This implies that  $\sqrt{k_{X_n}(x, x)} \leq \sup_{\|g\|_{\mathcal{H}_k} \leq 1} \|g - m_{g,X_n}\|_{L_\infty(\Omega)}$  for all  $x \in \Omega$ , which further implies that  $\sup_{x \in \Omega} \sqrt{k_{X_n}(x, x)} \leq \sup_{\|g\|_{\mathcal{H}_k} \leq 1} \|g - m_{g,X_n}\|_{L_\infty(\Omega)}$ . Therefore, for large enough  $n$  we have  $\sup_{x \in \Omega} \sqrt{k_{X_n}(x, x)} \leq c_3 n^{-r/d+1/2}$  if  $x_1, \dots, x_n$  are equally-spaced grid points in  $\Omega$ . In other words, there exists  $n_0 \in \mathbb{N}$  such that

$$\sup_{x \in \Omega} \sqrt{k_{X_n}(x, x)} \leq c_3 n^{-r/d+1/2}, \quad \forall n \geq n_0.$$

Note that there exists a constant  $c_4 > 0$  such that  $\sqrt{k_{X_n}(x, x)} \leq c_4$  holds for all  $x \in \Omega$  and for all  $n \in \mathbb{N}$ , since  $\Omega$  is compact,  $k_{X_n}(x, x)$  is continuous w.r.t.  $x$  for any fixed  $n$  and  $k_{X_n}(x, x)$  is non-increasing w.r.t.  $n$  for any fixed  $x \in \Omega$ . Therefore  $\sup_{x \in \Omega} \sqrt{k_{X_n}(x, x)} \leq c_4$  for all  $n \in \mathbb{N}$ .

Now, define  $c_5 > 0$  as a constant such that  $c_5 n_0^{-r/d+1/2} = c_4$ , and let  $c_6 := \max(c_5, c_3)$ . Then, for  $n < n_0$  we have  $c_6 n^{-r/d+1/2} \geq c_5 n^{-r/d+1/2} \geq c_4 \geq \sup_{x \in \Omega} \sqrt{k_{X_n}(x, x)}$ . For  $n \geq n_0$ , we have  $c_6 n^{-r/d+1/2} \geq c_3 n^{-r/d+1/2} \geq \sup_{x \in \Omega} \sqrt{k_{X_n}(x, x)}$ . Therefore we conclude that, if  $x_1, \dots, x_n$  are equally-spaced grid points in  $\Omega$ , we have

$$\sup_{x \in \Omega} \sqrt{k_{X_n}(x, x)} \leq c_6 n^{-r/d+1/2}, \quad \forall n \in \mathbb{N},$$

Finally, by Lemma C.1 we have

$$d_n(\mathcal{C}_{k,q}) \leq \sup_{x \in \Omega} q(x) c_6 n^{-r/d+1/2}$$

and thus the assertion holds with  $C_0 := \sup_{x \in \Omega} q(x) c_6 < \infty$ , which is bounded since  $q$  is continuous and  $\Omega$  is compact. □

#### C.4.2 Convergence Rates

Combining Prop. C.2 and Thm. 3.3, we have the following bound on  $\sup_{x \in \Omega} q(x) \sqrt{k_{X_n}(x, x)}$ , for  $x_1, \dots, x_n$  are generated by a  $\tilde{\gamma}$ -weak version of ABQ (9) with a constant  $0 < \tilde{\gamma} \leq 1$ .

**Theorem C.3.** *Suppose that Assumptions 2, 3, 4 and 5 are satisfied. Let  $k(x, x') = \Phi(x - x')$  be a kernel satisfying (13) for  $r > d/2$ . For a constant  $0 < \tilde{\gamma} \leq 1$ , assume that  $X_n = \{x_1, \dots, x_n\} \subset \Omega$  are generated by a  $\tilde{\gamma}$ -weak version of ABQ (4), i.e., (9) is satisfied. Then there exists a constant  $C_1 > 0$  such that*

$$\sup_{x \in \Omega} q(x) \sqrt{k_{X_n}(x, x)} \leq C_1 \psi(\tilde{\gamma} C_L / C_U)^{-1} n^{-r/d+1/2}, \quad n \in \mathbb{N}.$$

*Proof.* Let  $h_x := q(x)k(\cdot, x)$  for any  $x \in \Omega$ . Then by Thm. 3.3,  $h_{x_1}, \dots, h_{x_n}$  are a  $\gamma$ -weak greedy approximation of  $\mathcal{C}_{k,q}$  in  $\mathcal{H}_k$  with  $\gamma = \sqrt{\psi(\tilde{\gamma}C_L/C_U)}$ . From this, and by Lemma 4.1 (polynomial decay) and Prop. C.2, there exists a constant  $C_0 > 0$  such that  $e_n(\mathcal{C}_{k,q}) \leq 2^{5\alpha+2}\gamma^{-2}C_0n^{-\alpha}$  holds for all  $n \in \mathbb{N}$ , where  $\alpha := r/d - 1/2$ . Combining this inequality and (8) yields assertion with  $C_1 = 2^{5\alpha+2}C_0$ .  $\square$

As a corollary of Prop. 2.1 and Thm. C.3, we have the following result.

**Corollary C.4.** *Suppose that Assumptions 1, 2, 3, 4 and 5 are satisfied, and that  $C_{\pi/q} := \int |\pi(x)/q(x)|d\mu(x) < \infty$ . Assume  $k(x, x') = \Phi(x - x')$  satisfies (13) with  $r > d/2$ . For a constant  $0 < \tilde{\gamma} \leq 1$ , assume that  $X_n = \{x_1, \dots, x_n\} \subset \Omega$  are generated by a  $\tilde{\gamma}$ -weak version of ABQ (4), i.e., (9) is satisfied. Then we have*

$$\left| \int f(x)\pi(x)d\mu(x) - \int T(m_{g,X_n}(x))\pi(x)d\mu(x) \right| = O(n^{-r/d+1/2}) \quad (n \rightarrow \infty).$$

### C.5 Bounds for GP Posterior Mean Functions

The following lemma is used for deriving the constants  $C_L$  and  $C_U$  in Assumption 3 for individual ABQ methods.

**Lemma C.5.** *Assume that  $\tilde{g} := g - m \in \mathcal{H}_k$ . Then for all  $x \in \Omega$  and  $n \in \mathbb{N}$ , we have*

$$|m(x)| - 2\|\tilde{g}\|_{\mathcal{H}_k}\sqrt{k(x, x)} \leq |m_{g,X_n}(x)| \leq |m(x)| + 2\|\tilde{g}\|_{\mathcal{H}_k}\sqrt{k(x, x)}$$

*Proof.* We show the lower-bound; the upper-bound can be shown similarly. Since  $\tilde{g} \in \mathcal{H}_k$ , we have

$$\begin{aligned} |m_{\tilde{g},X_n}(x)| &\leq |\tilde{g}(x)| + |\tilde{g}(x) - m_{\tilde{g},X_n}(x)| \\ &\leq \|\tilde{g}\|_{\mathcal{H}_k}\sqrt{k(x, x)} + \|\tilde{g}\|_{\mathcal{H}_k}\sqrt{k_{X_n}(x, x)} \leq 2\|\tilde{g}\|_{\mathcal{H}_k}\sqrt{k(x, x)}. \end{aligned} \quad (14)$$

Note that  $m_{g,X_n}(x) = m(x) + m_{\tilde{g},X_n}(x)$  since  $\tilde{g} = g - m$ . Therefore,

$$|m_{g,X_n}(x)| \geq |m(x)| - |m_{\tilde{g},X_n}(x)| \geq |m(x)| - 2\|\tilde{g}\|_{\mathcal{H}_k}\sqrt{k(x, x)}.$$

$\square$

### C.6 Proof of Lemma 4.6

*Proof.* First note that  $0 \leq k_{X_n}(x, x) \leq k(x, x)$  for all  $x \in \Omega$  and  $n \in \mathbb{N}$ . Using Lemma C.5, we have

$$\begin{aligned} \exp(k_{X_n}(x, x) + 2m_{g,X_n}(x)) &\leq \exp(k_{X_n}(x, x) + 2|m_{g,X_n}(x)|) \\ &\leq \exp(k(x, x) + 2|m(x)| + 4\|\tilde{g}\|_{\mathcal{H}_k}\sqrt{k(x, x)}) \\ &\leq \exp(\|k\|_{L_\infty(\Omega)} + 2\|m\|_{L_\infty(\Omega)} + 4\|\tilde{g}\|_{\mathcal{H}_k}\|k\|_{L_\infty(\Omega)}^{1/2}) \end{aligned}$$

Similarly, we have

$$\begin{aligned} \exp(k_{X_n}(x, x) + 2m_{g,X_n}(x)) &\geq \exp(2m_{g,X_n}(x)) \\ &\geq \exp(-2|m_{g,X_n}(x)|) \\ &\geq \exp(-2|m(x)| - 4\|\tilde{g}\|_{\mathcal{H}_k}\sqrt{k(x, x)}) \\ &\geq \exp(-2\|m\|_{L_\infty(\Omega)} - 4\|\tilde{g}\|_{\mathcal{H}_k}\|k\|_{L_\infty(\Omega)}^{1/2}) \end{aligned}$$

$\square$

### C.7 Bounds for WSABI-M

The following bounds for  $b_{X_n}(x) = \frac{1}{2}k_{X_n}(x, x) + (m_{g,X_n}(x))^2$  of the WSABI-M [16] can be easily obtained using Lemma C.5 and  $0 \leq \frac{1}{2}k_{X_n}(x, x) \leq \frac{1}{2}\|k\|_{L_\infty(\Omega)}$ .

**Lemma C.6.** *Let  $b_{X_n}(x) = \frac{1}{2}k_{X_n}(x, x) + (m_{g,X_n}(x))^2$ . Suppose that Assumption 1 is satisfied, and that  $\inf_{x \in \Omega} |m(x)| > 2\|\tilde{g}\|_{\mathcal{H}_k}\|k\|_{L_\infty(\Omega)}^{1/2}$ . Then  $C_L < b_n(x) < C_U$  for all  $x \in \Omega$  and  $n \in \mathbb{N}$ , where  $C_L := (\inf_{x \in \Omega} |m(x)| - 2\|\tilde{g}\|_{\mathcal{H}_k}\|k\|_{L_\infty(\Omega)}^{1/2})^2 > 0$  and  $C_U := \frac{1}{2}\|k\|_{L_\infty(\Omega)} + (\|m\|_{L_\infty(\Omega)} + \|k\|_{L_\infty(\Omega)}^{1/2})^2 < \infty$ .*

## C.8 Discussion for Variational Bayesian Monte Carlo (VBMC)

The VBMC by Acerbi [1, 2] uses  $F(y) = y^{\delta_1}$ ,  $q(x) = 1$  and  $b_n(x) = \pi_n^{\delta_2}(x) \exp(\delta_3 m_{g, X_n}(x))$ , where  $\pi_n$  is the variational posterior at the  $n$ -th iteration and  $\delta_1, \delta_2, \delta_3 \geq 0$  are constants. Recall that in this method the transformation is identity:  $T(y) = y$  for  $y \in \mathbb{R}$ ; thus  $g = f$ . The following result can be easily obtained from Lemma C.5.

**Lemma C.7.** *Let  $b_n(x) = \pi_n^{\delta_2}(x) \exp(\delta_3 m_{g, X_n}(x))$  with  $\delta_2, \delta_3 \geq 0$ . Suppose that Assumption 1 is satisfied, and that there exist constants  $D_L, D_U$  such that  $0 < D_L < \pi_n(x) < D_U < \infty$  holds for all  $x \in \Omega$  and  $n \in \mathbb{N}$ . Then we have  $C_L < b_n(x) < C_U < \infty$  for all  $x \in \Omega$  and  $n \in \mathbb{N}$ , where  $C_L := D_L^{\delta_2} \exp(-\delta_3(\|m\|_{L_\infty(\Omega)} + 2\|\tilde{g}\|_{\mathcal{H}_k}\|k\|_{L_\infty(\Omega)}^{1/2})) > 0$  and  $C_U := D_U^{\delta_2} \exp(\delta_3(\|m\|_{L_\infty(\Omega)} + 2\|\tilde{g}\|_{\mathcal{H}_k}\|k\|_{L_\infty(\Omega)}^{1/2})) < \infty$ .*

The condition  $0 < D_L < \pi_n(x) < D_U < \infty$  for all  $x \in \Omega$  and  $n \in \mathbb{N}$  requires that i) the supports of the variational distributions should cover the whole domain  $\Omega$ ; and that ii) the density values of the variational distributions should be uniformly bounded from above. This implies that, if the variational family is a set of Gaussian mixtures (as proposed by Acerbi [1, 2]), then the variance of each mixture component should be uniformly lower- and upper-bounded; otherwise the condition  $0 < D_L < \pi_n(x) < D_U < \infty$  may not be satisfied.

We note that in the setting of the VBMC, the density  $\pi$  in the target integral  $\int f(x)\pi(x)d\mu(x)$  is an intractable posterior density, and it is to be approximated as  $\int m_{f, X_n}(x)\pi_n(x)d\mu(x)$  using the variational posterior  $\pi_n$ ; therefore there is also an error due to the approximation of  $\pi$  by  $\pi_n$ . Thus, a complete theoretical analysis requires analyzing the convergence behavior of the variational posterior  $\pi_n$ ; this is out of scope of this paper and we leave it for future research.
